# Supplementary material for: Enhanced Lithium Storage Performance in Si/MXene Porous Composites
Source: MDPI journal article supplement (doi:10.3390/inorganics11070279), 2023-06-29
Supplement: s1 [file s1]

## Supporting Information

### Enhanced lithium storage performance in Si/MXene porous composites

Hao Yang, Tingting Jiang \*, Yingke Zhou \*

The State Key Laboratory of Refractories and Metallurgy, College of Materials and Metallurgy, Wuhan University of Science and Technology, Wuhan 430081, P. R. China

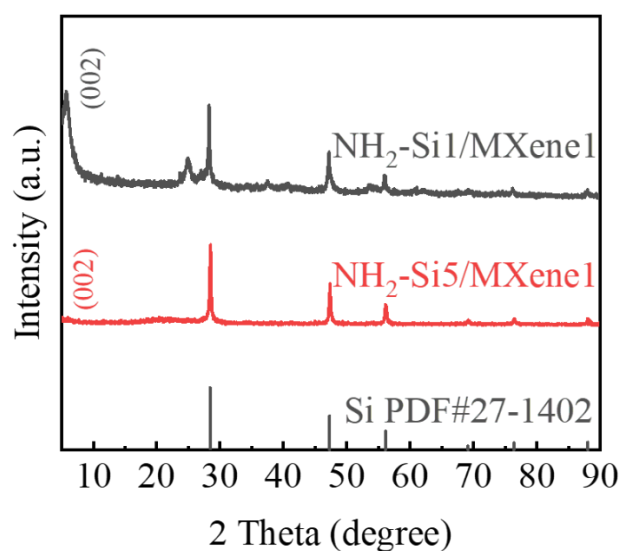

**Figure S1.** The XRD patterns of NH<sub>2</sub>-Si1/MXene and NH<sub>2</sub>-Si5/MXene1.

---

\* Corresponding authors. E-mail: ttjiang@wust.edu.cn (T. T. Jiang); zhouyk@wust.edu.cn (Y. K. Zhou).

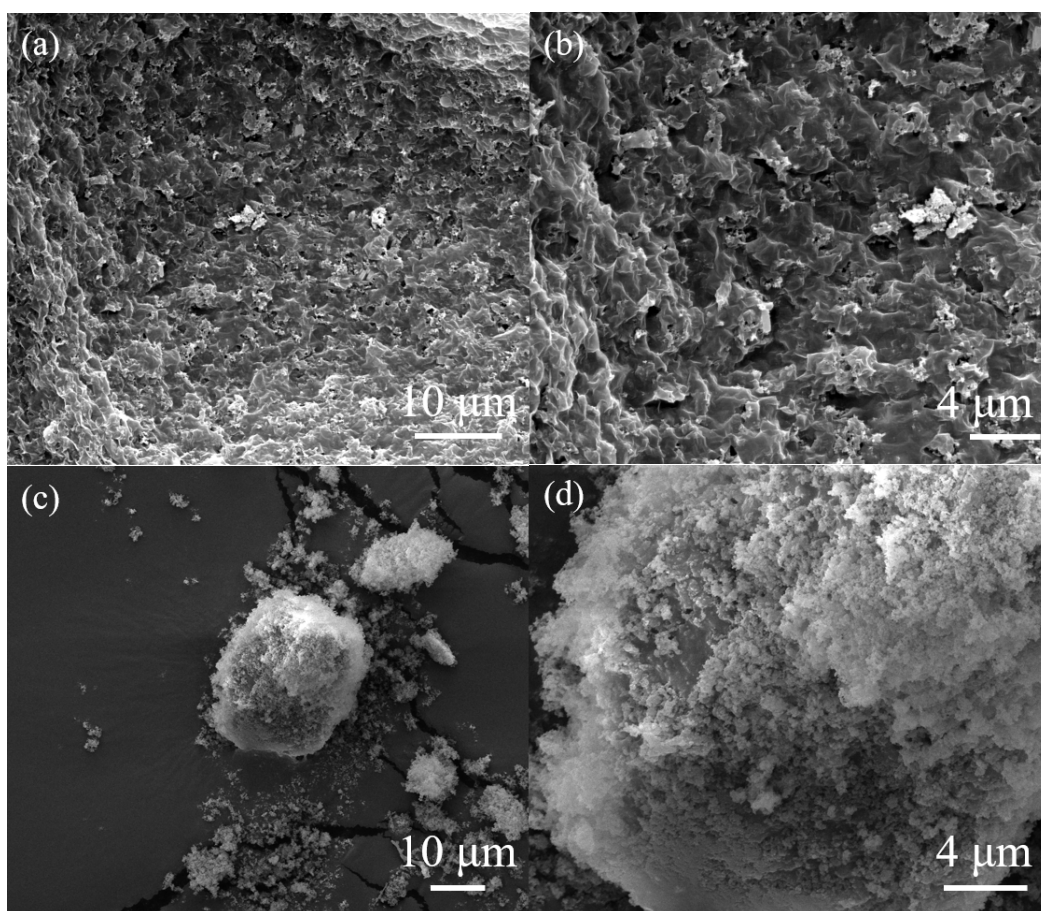

**Figure S2.** SEM images of (a,b)  $\text{NH}_2\text{-Si1/MXene1}$  and (c,d)  $\text{NH}_2\text{-Si5/MXene1}$ .

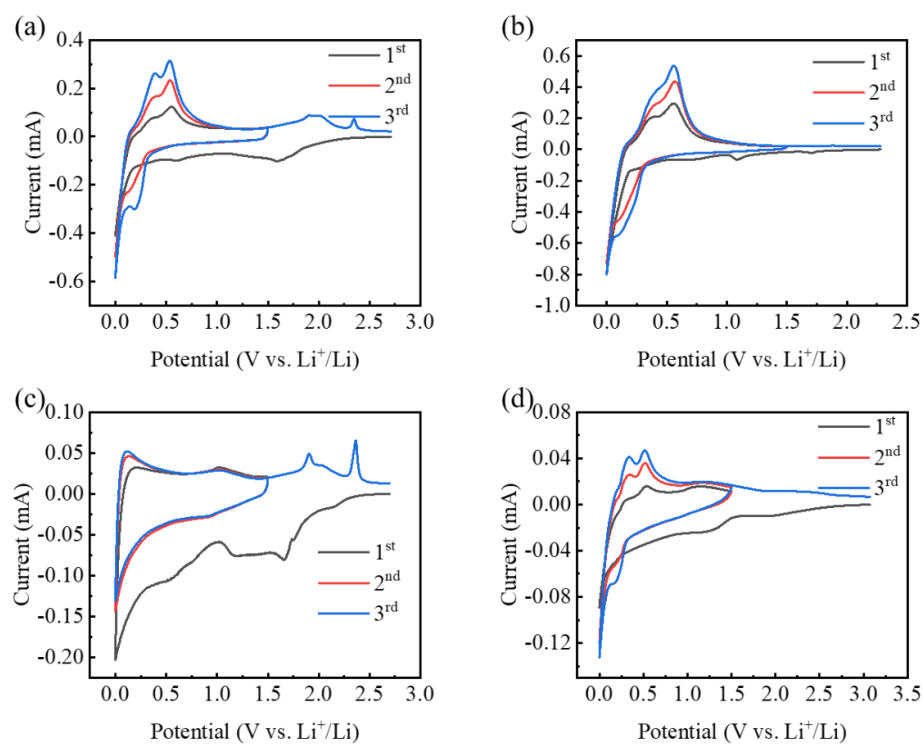

**Figure S3.** CVs of the first three cycles at  $0.2 \text{ mV s}^{-1}$  from 0.01 to 1.5 V for (a)  $\text{NH}_2\text{-Si1/MXene1}$ , (b)  $\text{NH}_2\text{-Si5/MXene1}$ , (c) MXene and (d) Si.
